# Supplementary material for: Zwitterionic superabsorbent polymer hydrogels for efficient and selective removal of organic dyes
Source: Royal Society of Chemistry journal article supplement (doi:10.1039/c9ra02488c), 2019-01-01
Supplement: c9ra02488c1.pdf [file c9ra02488c1.pdf]

## Zwitter-ionic superabsorbent polymer hydrogels for efficient and selective removal of organic dyes

Tanzil Ur Rehman, Luqman Ali Shah\*, Mansoor Khan, Muhammad Irfan and Noor Saeed

Khattak

*Polymer laboratory, National Center of Excellence in Physical Chemistry, University of*

*Peshawar, Peshawar, KPK 25120, Pakistan*

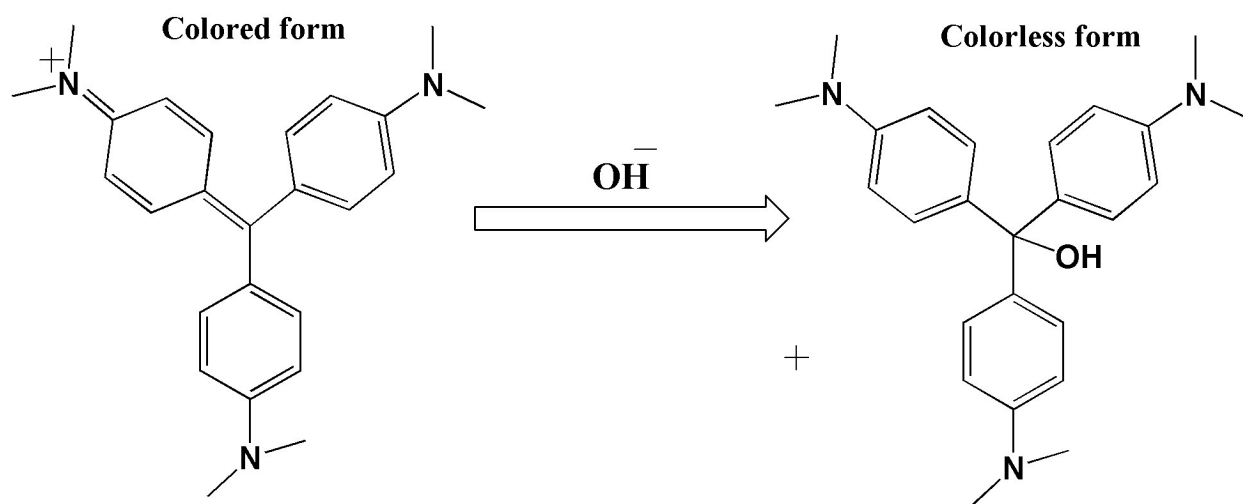

**Fig.S1** Decolorization of deep color of CV into colorless after reaction with NaOH
